# Supplementary material
Source: Springer Nature journal article supplement (https://www.springermedizin.de/resource/supplementary/12889_2013_6023_MOESM2_ESM.pdf/9494152)
Supplement: MOESM2 [file 9494152]

Nov. 2012

|         |                                     |                                     |                                     |                                     |
|---------|-------------------------------------|-------------------------------------|-------------------------------------|-------------------------------------|
| Control | Control                             | Control                             | Control                             | Random.<br>group 4:<br>Intervention |
| Control | Control                             | Control                             | Random.<br>group 3:<br>Intervention | Maintainance                        |
| Control | Control                             | Random.<br>group 2:<br>Intervention | Maintainance                        | Maintainance                        |
| Control | Random.<br>group 1:<br>Intervention | Maintainance                        | Maintainance                        | Maintainance                        |

Ongoing evaluation with text-messages

3 months

3 months

3 months

3 months

3 months
